# Supplementary material
Source: PubMed Central journal article supplement (PMC6865300)
Supplement: jamaoncol-6-100-s003.pdf [file jamaoncol-6-100-s003.pdf]

## Data Sharing Statement

Heinhuis. Safety, Tolerability, and Potential Clinical Activity of a Glucocorticoid-Induced TNF Receptor-Related Protein Agonist Alone or in Combination With Nivolumab for Patients With Advanced Solid Tumors. *JAMA Oncol*. Published November 07, 2019. 10.1001/jamaoncol.2019.3848

### Data

**Data available:** No

### Additional Information

**Explanation for why data not available:** Bristol-Myers Squibb will honor legitimate requests for our clinical trial data from qualified researchers. We will share clinical trial data from our in-scope Phase I-IV interventional trials in patients that have completed on or after January 1, 2008. This includes de-identified patient-level and study-level clinical trial data, full clinical study reports and protocols from clinical trials conducted in patients for medicines and indications approved in the U.S. and/or EU. Sharing is subject to protection of patient privacy and respect for the patient's informed consent.
